# Supplementary material for: Unravelling performance of honeycomb structures as drug delivery systems for the isoniazid drug using DFT-D3 correction dispersion and molecular dynamic simulations
Source: Royal Society of Chemistry journal article supplement (doi:10.1039/d3cp05457h), 2024-01-01
Supplement: d3cp05457h1.pdf [file d3cp05457h1.pdf]

H2O+O-Isoniazide-Parallel-Top-Al-AIN-vdw-opted

163

|    |           |           |           |
|----|-----------|-----------|-----------|
| N  | 13.010987 | 13.038238 | -0.085031 |
| Al | 12.115050 | 14.621977 | -0.083753 |
| Al | 14.872386 | 16.187415 | -0.048138 |
| N  | 15.751129 | 11.415763 | -0.074788 |
| Al | 14.847477 | 13.009312 | -0.065575 |
| Al | 17.611298 | 14.572337 | -0.042967 |
| N  | 15.776746 | 14.584045 | -0.053699 |
| N  | 18.548131 | 16.151867 | 0.002733  |
| Al | 17.634562 | 17.744452 | -0.019182 |
| Al | 20.393439 | 19.298036 | -0.004761 |
| N  | 18.480374 | 9.802958  | -0.044708 |
| Al | 17.574699 | 11.404314 | -0.065123 |
| Al | 20.342559 | 12.971580 | 0.015167  |
| N  | 18.523126 | 12.984848 | -0.039267 |
| N  | 21.268574 | 14.529361 | 0.257491  |
| Al | 20.378922 | 16.127591 | 0.080430  |
| Al | 23.132893 | 17.700673 | -0.031613 |
| N  | 21.291818 | 17.709863 | 0.010935  |
| N  | 24.058112 | 19.278696 | -0.012507 |
| Al | 23.157442 | 20.869003 | -0.000814 |
| N  | 21.209860 | 8.193470  | -0.028038 |
| Al | 20.306043 | 9.783235  | -0.023463 |
| Al | 23.085881 | 11.366662 | -0.006464 |
| N  | 21.247433 | 11.360119 | 0.117589  |
| N  | 23.991463 | 12.929912 | -0.008763 |
| Al | 23.148522 | 14.569803 | 0.325502  |
| Al | 25.846132 | 16.097244 | -0.036252 |
| N  | 24.026717 | 16.116194 | -0.099010 |
| N  | 26.788973 | 17.662433 | 0.003313  |
| Al | 25.885238 | 19.260988 | 0.004839  |
| N  | 23.936294 | 6.583461  | -0.021522 |
| Al | 23.040421 | 8.184971  | -0.027779 |
| Al | 25.802663 | 9.747264  | 0.000388  |
| N  | 23.965597 | 9.762735  | -0.020623 |
| N  | 26.731301 | 11.324404 | 0.004754  |
| Al | 25.812133 | 12.921659 | 0.010789  |
| Al | 28.581009 | 14.475675 | 0.034244  |
| N  | 26.747448 | 14.497577 | 0.026738  |
| N  | 29.519260 | 16.056735 | 0.035137  |
| Al | 28.613913 | 17.649908 | 0.023774  |
| N  | 26.711487 | 8.161530  | 0.007081  |
| N  | 29.470996 | 9.720036  | 0.032971  |
| Al | 28.553061 | 11.305082 | 0.036008  |
| Al | 31.316809 | 12.864193 | 0.056232  |
| N  | 29.483015 | 12.897414 | 0.057220  |
| N  | 32.256081 | 14.452689 | 0.064351  |
| Al | 31.346790 | 16.037338 | 0.051397  |

|    |           |           |          |
|----|-----------|-----------|----------|
| N  | 32.225721 | 11.276363 | 0.070164 |
| N  | 34.981097 | 12.841700 | 0.068965 |
| Al | 34.081844 | 14.425420 | 0.066610 |
| C  | 25.362505 | 10.730009 | 4.454046 |
| C  | 24.194160 | 11.414990 | 4.076279 |
| C  | 24.329301 | 12.673308 | 3.433983 |
| C  | 25.648360 | 13.167828 | 3.235164 |
| C  | 26.745436 | 12.399985 | 3.659795 |
| N  | 26.625305 | 11.184683 | 4.263325 |
| C  | 23.229585 | 13.505787 | 2.881047 |
| O  | 23.512500 | 14.599617 | 2.277339 |
| N  | 21.897908 | 13.190226 | 2.915440 |
| N  | 21.412502 | 11.898601 | 3.144057 |
| H  | 25.311333 | 9.740546  | 4.950738 |
| H  | 23.166807 | 10.969717 | 4.222441 |
| H  | 25.806004 | 14.135385 | 2.741666 |
| H  | 27.746116 | 12.733655 | 3.494746 |
| H  | 21.406876 | 13.847650 | 2.267312 |
| H  | 20.495827 | 11.982324 | 3.692687 |
| H  | 21.216713 | 11.494536 | 2.196682 |
| O  | 22.555628 | 17.132409 | 4.647907 |
| H  | 21.920193 | 17.498456 | 4.017042 |
| H  | 22.701337 | 16.220443 | 4.392121 |
| O  | 23.440039 | 13.989459 | 5.810497 |
| H  | 22.559350 | 14.274266 | 5.504956 |
| H  | 23.964182 | 14.817889 | 5.821059 |
| O  | 19.799570 | 13.374683 | 5.621795 |
| H  | 20.205256 | 14.074086 | 6.145538 |
| H  | 19.795981 | 12.630802 | 6.223538 |
| O  | 26.026059 | 17.656153 | 3.870665 |
| H  | 25.200592 | 18.073122 | 3.617275 |
| H  | 26.603518 | 18.370199 | 4.065772 |
| O  | 19.507064 | 15.990832 | 4.155412 |
| H  | 18.919240 | 15.427093 | 4.626233 |
| H  | 19.938112 | 16.523269 | 4.826007 |
| O  | 25.461771 | 16.072013 | 6.053652 |
| H  | 25.598761 | 16.673469 | 5.341544 |
| H  | 25.298615 | 16.656575 | 6.791044 |
| O  | 19.872644 | 10.142077 | 6.832416 |
| H  | 20.779433 | 9.806140  | 6.768892 |
| H  | 19.504587 | 9.994179  | 5.976366 |
| O  | 22.540981 | 18.970150 | 6.847821 |
| H  | 22.871650 | 18.439578 | 6.106333 |
| H  | 23.095715 | 19.781385 | 6.850438 |
| O  | 20.009998 | 18.946157 | 4.246446 |
| H  | 19.364548 | 18.237124 | 4.049147 |
| H  | 20.182024 | 19.385876 | 3.387225 |
| O  | 24.448276 | 8.895210  | 7.510502 |
| H  | 24.283395 | 9.113655  | 6.606384 |
| H  | 24.261410 | 9.675667  | 8.026784 |
| O  | 20.466404 | 15.828590 | 7.085925 |
| H  | 20.045056 | 16.342413 | 7.804369 |

|   |           |           |           |
|---|-----------|-----------|-----------|
| H | 21.424498 | 15.768013 | 7.365358  |
| O | 23.759573 | 19.453207 | 4.198770  |
| H | 23.160937 | 20.008682 | 4.737653  |
| H | 23.364249 | 19.460653 | 3.342275  |
| O | 26.653481 | 14.895166 | 8.160240  |
| H | 27.362802 | 15.521609 | 8.338858  |
| H | 26.223753 | 15.230076 | 7.363018  |
| O | 26.660873 | 11.867150 | 8.346220  |
| H | 25.761016 | 11.686772 | 8.609753  |
| H | 26.757869 | 12.826982 | 8.473577  |
| O | 29.609174 | 15.244944 | 6.541386  |
| H | 29.434442 | 15.207852 | 5.602141  |
| H | 30.232475 | 14.524306 | 6.681285  |
| O | 17.286746 | 11.593814 | 3.747889  |
| H | 17.708637 | 12.452738 | 3.737111  |
| H | 17.309238 | 11.334908 | 2.830485  |
| O | 17.075016 | 14.509165 | 5.409464  |
| H | 16.602488 | 14.892028 | 6.121563  |
| H | 17.396186 | 13.697298 | 5.793958  |
| O | 29.915443 | 15.111182 | 3.730235  |
| H | 29.695434 | 14.989095 | 2.807413  |
| H | 30.561567 | 14.435964 | 3.894484  |
| O | 23.873155 | 11.415628 | 9.304261  |
| H | 23.392165 | 11.930984 | 8.668805  |
| H | 24.384154 | 12.052999 | 9.755019  |
| O | 24.627416 | 18.656941 | 8.884899  |
| H | 23.775262 | 18.662855 | 8.468948  |
| H | 24.485342 | 18.122131 | 9.713407  |
| O | 20.507380 | 17.909001 | 9.072585  |
| H | 20.841387 | 18.298163 | 8.279641  |
| H | 21.057914 | 18.293148 | 9.776452  |
| O | 21.968697 | 15.381256 | 9.367747  |
| H | 21.371645 | 14.830275 | 9.865809  |
| H | 21.582060 | 16.268288 | 9.440656  |
| O | 24.787740 | 14.173124 | 10.021262 |
| H | 23.944934 | 14.462151 | 9.736924  |
| H | 25.399024 | 14.641705 | 9.436965  |
| O | 28.378528 | 16.414741 | 9.904828  |
| H | 29.199976 | 16.884766 | 9.782665  |
| H | 28.656743 | 15.554394 | 10.301158 |
| O | 19.373856 | 11.215662 | 10.161267 |
| H | 19.176075 | 10.990447 | 9.268332  |
| H | 19.558844 | 10.364728 | 10.573816 |
| O | 16.653070 | 15.043881 | 9.957672  |
| H | 16.699005 | 15.983836 | 10.252763 |
| H | 16.025477 | 15.048808 | 9.238217  |
| O | 15.360991 | 15.197036 | 7.692975  |
| H | 14.446062 | 15.306692 | 7.442388  |
| H | 15.515093 | 14.300703 | 7.507458  |
| O | 31.713490 | 13.507640 | 7.191609  |
| H | 32.292982 | 13.109730 | 6.505490  |
| H | 31.742659 | 12.895647 | 7.915958  |

|   |           |           |           |
|---|-----------|-----------|-----------|
| O | 19.951916 | 13.848829 | 10.400131 |
| H | 19.056765 | 14.111863 | 10.303228 |
| H | 19.892838 | 12.906514 | 10.315817 |
| O | 30.199216 | 11.030691 | 5.651571  |
| H | 29.325533 | 11.152701 | 5.285489  |
| H | 30.555541 | 11.915912 | 5.735049  |
| O | 13.121653 | 14.203349 | 6.809663  |
| H | 13.638173 | 13.816787 | 6.117491  |
| H | 13.135496 | 13.605300 | 7.531606  |
| O | 33.964638 | 14.517857 | 8.088161  |
| H | 33.051598 | 14.614709 | 7.876351  |
| H | 34.145871 | 13.565744 | 7.892764  |

### H2O+O-Isoniazide-Top-B-vdw-optimized

185

|   |           |           |           |
|---|-----------|-----------|-----------|
| O | 22.558000 | 17.133000 | 4.650000  |
| H | 21.923000 | 17.468000 | 4.016000  |
| H | 22.701000 | 16.223000 | 4.389000  |
| O | 23.359000 | 8.641000  | 10.634000 |
| H | 23.654000 | 8.161000  | 9.860000  |
| H | 23.855000 | 9.459000  | 10.613000 |
| O | 16.928000 | 12.089000 | 7.832000  |
| H | 17.278000 | 11.413000 | 8.413000  |
| H | 17.642000 | 12.274000 | 7.223000  |
| O | 26.021000 | 17.654000 | 3.869000  |
| H | 25.206000 | 18.086000 | 3.610000  |
| H | 26.614000 | 18.372000 | 4.089000  |
| O | 19.495000 | 15.993000 | 4.159000  |
| H | 18.899000 | 15.430000 | 4.653000  |
| H | 19.919000 | 16.535000 | 4.824000  |
| O | 25.459000 | 16.079000 | 6.057000  |
| H | 25.610000 | 16.667000 | 5.316000  |
| H | 25.286000 | 16.662000 | 6.795000  |
| O | 19.879000 | 10.144000 | 6.836000  |
| H | 20.770000 | 9.802000  | 6.751000  |
| H | 19.483000 | 9.994000  | 5.977000  |
| O | 22.540000 | 18.974000 | 6.848000  |
| H | 22.864000 | 18.449000 | 6.116000  |
| H | 23.076000 | 19.767000 | 6.829000  |
| O | 23.270000 | 8.287000  | 4.480000  |
| H | 22.410000 | 8.219000  | 4.065000  |
| H | 23.845000 | 7.759000  | 3.927000  |
| O | 24.446000 | 8.891000  | 7.515000  |
| H | 24.295000 | 9.139000  | 6.602000  |
| H | 24.237000 | 9.680000  | 8.015000  |
| O | 20.478000 | 15.834000 | 7.088000  |
| H | 20.066000 | 16.339000 | 7.790000  |

|   |           |           |           |
|---|-----------|-----------|-----------|
| H | 21.393000 | 15.756000 | 7.354000  |
| O | 27.795000 | 9.339000  | 4.181000  |
| H | 27.424000 | 10.104000 | 4.618000  |
| H | 27.155000 | 9.115000  | 3.505000  |
| O | 26.655000 | 14.898000 | 8.160000  |
| H | 27.353000 | 15.530000 | 8.336000  |
| H | 26.230000 | 15.224000 | 7.367000  |
| O | 26.659000 | 11.868000 | 8.347000  |
| H | 25.758000 | 11.680000 | 8.611000  |
| H | 26.747000 | 12.816000 | 8.454000  |
| O | 29.610000 | 15.242000 | 6.545000  |
| H | 29.410000 | 15.202000 | 5.610000  |
| H | 30.220000 | 14.520000 | 6.692000  |
| O | 27.754000 | 12.776000 | 4.222000  |
| H | 27.831000 | 13.695000 | 4.482000  |
| H | 28.658000 | 12.486000 | 4.098000  |
| O | 16.402000 | 14.722000 | 4.626000  |
| H | 16.609000 | 14.828000 | 5.555000  |
| H | 16.001000 | 13.856000 | 4.567000  |
| O | 29.438000 | 15.337000 | 3.435000  |
| H | 29.335000 | 16.256000 | 3.684000  |
| H | 30.374000 | 15.166000 | 3.533000  |
| O | 23.874000 | 11.413000 | 9.300000  |
| H | 23.381000 | 11.906000 | 8.645000  |
| H | 24.381000 | 12.077000 | 9.768000  |
| O | 24.624000 | 18.653000 | 8.885000  |
| H | 23.766000 | 18.670000 | 8.465000  |
| H | 24.486000 | 18.158000 | 9.694000  |
| O | 20.505000 | 17.909000 | 9.073000  |
| H | 20.849000 | 18.297000 | 8.270000  |
| H | 21.049000 | 18.275000 | 9.771000  |
| O | 21.974000 | 15.383000 | 9.375000  |
| H | 21.371000 | 14.818000 | 9.860000  |
| H | 21.603000 | 16.261000 | 9.464000  |
| O | 24.790000 | 14.175000 | 10.020000 |
| H | 23.930000 | 14.477000 | 9.728000  |
| H | 25.409000 | 14.625000 | 9.447000  |
| O | 28.375000 | 16.414000 | 9.899000  |
| H | 29.199000 | 16.890000 | 9.792000  |
| H | 28.629000 | 15.586000 | 10.307000 |
| O | 19.374000 | 11.217000 | 10.159000 |
| H | 19.171000 | 10.986000 | 9.252000  |
| H | 19.575000 | 10.381000 | 10.579000 |
| O | 16.653000 | 15.043000 | 9.956000  |
| H | 16.704000 | 15.958000 | 10.234000 |
| H | 16.041000 | 15.049000 | 9.221000  |
| O | 17.657000 | 15.163000 | 7.950000  |
| H | 17.584000 | 16.012000 | 7.514000  |
| H | 17.919000 | 14.558000 | 7.256000  |
| O | 31.718000 | 13.509000 | 7.197000  |
| H | 32.263000 | 13.121000 | 6.512000  |
| H | 31.754000 | 12.881000 | 7.918000  |

|   |           |           |           |
|---|-----------|-----------|-----------|
| O | 19.955000 | 13.849000 | 10.397000 |
| H | 19.044000 | 14.135000 | 10.323000 |
| H | 19.914000 | 12.896000 | 10.334000 |
| O | 32.670000 | 13.697000 | 3.922000  |
| H | 31.761000 | 13.460000 | 3.736000  |
| H | 33.089000 | 12.873000 | 4.166000  |
| O | 13.635000 | 14.164000 | 6.787000  |
| H | 13.861000 | 13.753000 | 5.953000  |
| H | 13.874000 | 13.514000 | 7.448000  |
| O | 29.757000 | 11.393000 | 6.953000  |
| H | 29.376000 | 12.233000 | 6.697000  |
| H | 29.079000 | 10.749000 | 6.748000  |
| B | 23.659000 | 20.439000 | 0.273000  |
| N | 24.330000 | 19.187000 | 0.237000  |
| B | 25.752000 | 19.146000 | 0.205000  |
| N | 26.425000 | 17.897000 | 0.164000  |
| B | 27.845000 | 17.853000 | 0.163000  |
| N | 28.518000 | 16.602000 | 0.126000  |
| B | 29.939000 | 16.557000 | 0.136000  |
| N | 30.612000 | 15.305000 | 0.137000  |
| B | 32.032000 | 15.261000 | 0.212000  |
| N | 32.704000 | 14.010000 | 0.165000  |
| B | 34.125000 | 13.966000 | 0.192000  |
| N | 34.798000 | 12.716000 | 0.109000  |
| B | 21.492000 | 19.269000 | 0.334000  |
| N | 22.165000 | 18.018000 | 0.337000  |
| B | 23.585000 | 17.976000 | 0.283000  |
| N | 24.257000 | 16.726000 | 0.197000  |
| B | 25.676000 | 16.687000 | 0.139000  |
| N | 26.349000 | 15.437000 | 0.099000  |
| B | 27.770000 | 15.394000 | 0.092000  |
| N | 28.444000 | 14.144000 | 0.048000  |
| B | 29.864000 | 14.099000 | 0.051000  |
| N | 30.539000 | 12.848000 | -0.018000 |
| B | 31.959000 | 12.803000 | 0.041000  |
| N | 32.630000 | 11.550000 | 0.068000  |
| B | 19.324000 | 18.105000 | 0.296000  |
| N | 19.996000 | 16.853000 | 0.291000  |
| B | 21.419000 | 16.808000 | 0.265000  |
| N | 22.090000 | 15.561000 | 0.147000  |
| B | 23.511000 | 15.519000 | 0.093000  |
| N | 24.182000 | 14.279000 | -0.067000 |
| B | 25.597000 | 14.228000 | 0.040000  |
| N | 26.274000 | 12.978000 | 0.029000  |
| B | 27.693000 | 12.934000 | 0.013000  |
| N | 28.370000 | 11.684000 | -0.034000 |
| B | 29.790000 | 11.639000 | -0.018000 |
| N | 30.461000 | 10.386000 | 0.045000  |
| B | 17.155000 | 16.940000 | 0.252000  |
| N | 17.828000 | 15.687000 | 0.271000  |
| B | 19.249000 | 15.644000 | 0.228000  |
| N | 19.922000 | 14.396000 | 0.101000  |

|   |           |           |           |
|---|-----------|-----------|-----------|
| B | 21.344000 | 14.354000 | 0.038000  |
| N | 22.012000 | 13.114000 | -0.158000 |
| B | 23.435000 | 13.068000 | -0.117000 |
| N | 24.108000 | 11.813000 | -0.144000 |
| B | 25.524000 | 11.771000 | -0.039000 |
| N | 26.201000 | 10.520000 | -0.065000 |
| B | 27.622000 | 10.475000 | -0.060000 |
| N | 28.295000 | 9.222000  | -0.065000 |
| B | 14.989000 | 15.779000 | 0.097000  |
| N | 15.661000 | 14.528000 | 0.099000  |
| B | 17.081000 | 14.481000 | 0.170000  |
| N | 17.755000 | 13.233000 | 0.075000  |
| B | 19.175000 | 13.192000 | 0.012000  |
| N | 19.846000 | 11.943000 | -0.119000 |
| B | 21.269000 | 11.903000 | -0.149000 |
| N | 21.938000 | 10.648000 | -0.072000 |
| B | 23.362000 | 10.607000 | -0.070000 |
| N | 24.034000 | 9.353000  | -0.018000 |
| B | 25.453000 | 9.311000  | -0.095000 |
| N | 26.127000 | 8.061000  | -0.160000 |
| B | 12.819000 | 14.617000 | 0.045000  |
| N | 13.492000 | 13.367000 | -0.012000 |
| B | 14.913000 | 13.322000 | 0.011000  |
| N | 15.587000 | 12.073000 | -0.035000 |
| B | 17.007000 | 12.028000 | -0.024000 |
| N | 17.679000 | 10.777000 | -0.076000 |
| B | 19.101000 | 10.734000 | -0.063000 |
| N | 19.772000 | 9.484000  | 0.027000  |
| B | 21.194000 | 9.439000  | 0.022000  |
| N | 21.866000 | 8.184000  | 0.053000  |
| B | 23.287000 | 8.143000  | -0.019000 |
| N | 23.957000 | 6.896000  | -0.149000 |
| C | 20.237000 | 13.144000 | 5.929000  |
| C | 21.602000 | 13.265000 | 5.627000  |
| C | 22.053000 | 12.795000 | 4.382000  |
| C | 21.104000 | 12.219000 | 3.516000  |
| C | 19.770000 | 12.139000 | 3.925000  |
| N | 19.323000 | 12.592000 | 5.112000  |
| C | 23.445000 | 12.934000 | 3.835000  |
| O | 23.638000 | 12.980000 | 2.611000  |
| N | 24.539000 | 13.036000 | 4.666000  |
| N | 24.527000 | 12.758000 | 6.040000  |
| H | 19.860000 | 13.516000 | 6.890000  |
| H | 22.290000 | 13.714000 | 6.345000  |
| H | 21.427000 | 11.852000 | 2.537000  |
| H | 19.019000 | 11.692000 | 3.260000  |
| H | 25.427000 | 13.057000 | 4.153000  |
| H | 24.957000 | 11.845000 | 6.223000  |
| H | 25.059000 | 13.479000 | 6.535000  |

## H2O-O-Isoniazide-parallel-Top-Si-vdw-opted

163

|    |           |           |           |
|----|-----------|-----------|-----------|
| Si | 34.014184 | 14.515262 | 0.108433  |
| C  | 34.886438 | 13.001768 | 0.110412  |
| Si | 12.306316 | 14.551104 | -0.013314 |
| Si | 15.003102 | 16.150595 | -0.009485 |
| C  | 15.886373 | 14.595570 | -0.062048 |
| Si | 14.983624 | 13.029289 | 0.080629  |
| C  | 13.206152 | 13.032683 | 0.034764  |
| Si | 17.697964 | 17.662747 | -0.019298 |
| C  | 18.638445 | 16.113187 | 0.010984  |
| Si | 17.737773 | 14.585525 | 0.053962  |
| C  | 18.634373 | 13.014906 | 0.076698  |
| Si | 20.454573 | 13.008735 | 0.153630  |
| C  | 21.335040 | 14.569502 | 0.189880  |
| Si | 20.391873 | 16.083835 | 0.117167  |
| C  | 21.318428 | 17.680722 | 0.196305  |
| Si | 20.416914 | 19.250829 | 0.100794  |
| Si | 23.140496 | 20.801523 | 0.074742  |
| C  | 24.083214 | 19.249830 | 0.161839  |
| Si | 23.125279 | 17.706302 | 0.161183  |
| C  | 24.022669 | 16.146079 | 0.199784  |
| Si | 23.163727 | 14.556876 | 0.363581  |
| C  | 24.065586 | 12.979867 | 0.008339  |
| Si | 23.154760 | 11.426531 | -0.010826 |
| C  | 21.281217 | 11.470878 | 0.174538  |
| Si | 20.412954 | 9.890530  | 0.092145  |
| C  | 18.636867 | 9.786200  | 0.119654  |
| Si | 17.711013 | 11.418121 | 0.043681  |
| C  | 15.917443 | 11.477829 | -0.049119 |
| Si | 25.867205 | 19.295732 | 0.049482  |
| C  | 26.745601 | 17.690837 | 0.019175  |
| Si | 25.876381 | 16.161624 | 0.075886  |
| C  | 26.804745 | 14.556300 | -0.008398 |
| Si | 25.851549 | 13.023242 | -0.088971 |
| C  | 26.759725 | 11.417134 | -0.185500 |
| Si | 25.850944 | 9.877953  | -0.078009 |
| C  | 24.052118 | 9.809779  | 0.034250  |
| Si | 23.124931 | 8.299950  | 0.061597  |
| C  | 21.344069 | 8.293302  | 0.129090  |
| C  | 24.035669 | 6.717390  | 0.095728  |
| C  | 26.759623 | 8.298866  | -0.009895 |
| Si | 28.522180 | 11.382437 | -0.099360 |
| C  | 29.440069 | 12.946345 | -0.063272 |
| Si | 28.593082 | 14.559018 | -0.040524 |
| C  | 29.491651 | 16.127216 | 0.046051  |
| Si | 28.587463 | 17.628859 | 0.013087  |
| Si | 31.249600 | 16.085833 | 0.038650  |
| C  | 32.173476 | 14.535563 | 0.078488  |



|    |           |           |           |
|----|-----------|-----------|-----------|
| Si | 31.266918 | 12.973246 | -0.030354 |
| C  | 32.186823 | 11.381245 | 0.065038  |
| C  | 29.456229 | 9.867184  | -0.041723 |
| C  | 27.676524 | 12.815817 | 3.384418  |
| C  | 26.328160 | 12.464029 | 3.279823  |
| C  | 25.356406 | 13.468230 | 3.263553  |
| C  | 25.768279 | 14.822288 | 3.383594  |
| C  | 27.163764 | 15.063401 | 3.527412  |
| N  | 28.097191 | 14.081422 | 3.440345  |
| C  | 23.963282 | 13.287295 | 2.925409  |
| O  | 23.357551 | 14.323664 | 2.486291  |
| N  | 23.290756 | 12.143118 | 3.093948  |
| N  | 23.803553 | 10.891789 | 3.564778  |
| H  | 28.426460 | 11.949368 | 3.323791  |
| H  | 26.109897 | 11.359166 | 3.285311  |
| H  | 25.040845 | 15.601642 | 3.279892  |
| H  | 27.587668 | 15.975362 | 3.625797  |
| H  | 22.358975 | 12.203392 | 2.867081  |
| H  | 23.109480 | 10.484672 | 4.328433  |
| H  | 23.699206 | 10.250056 | 2.762901  |
| O  | 22.585892 | 17.139934 | 4.658029  |
| H  | 21.875815 | 17.278439 | 4.017186  |
| H  | 22.727521 | 16.196214 | 4.503142  |
| O  | 23.626730 | 13.322847 | 6.392736  |
| H  | 24.026062 | 12.759863 | 5.708940  |
| H  | 24.332669 | 13.991448 | 6.459422  |
| O  | 19.830504 | 13.407270 | 5.588394  |
| H  | 20.085549 | 14.205411 | 6.078875  |
| H  | 19.943059 | 12.687313 | 6.215669  |
| O  | 25.977186 | 17.656945 | 3.860704  |
| H  | 25.237726 | 18.176909 | 3.558994  |
| H  | 26.593735 | 18.279314 | 4.219164  |
| O  | 19.382466 | 16.012437 | 4.195480  |
| H  | 18.756083 | 15.532015 | 4.712527  |
| H  | 19.740900 | 16.557843 | 4.903440  |
| O  | 25.426025 | 16.142758 | 6.090947  |
| H  | 25.688653 | 16.603984 | 5.323501  |
| H  | 25.133572 | 16.803502 | 6.717263  |
| O  | 19.927330 | 10.169503 | 6.861405  |
| H  | 20.750122 | 9.737759  | 6.627796  |
| H  | 19.324682 | 9.964607  | 6.147267  |
| O  | 22.529223 | 19.001960 | 6.860569  |
| H  | 22.666282 | 18.358834 | 6.125666  |
| H  | 22.963056 | 19.835758 | 6.622006  |
| O  | 23.289320 | 8.325044  | 4.505147  |
| H  | 22.574340 | 8.275964  | 3.854336  |
| H  | 23.931076 | 7.698938  | 4.145094  |
| O  | 24.417027 | 8.869773  | 7.546581  |
| H  | 24.438025 | 9.207117  | 6.652830  |
| H  | 24.157901 | 9.635690  | 8.046159  |
| O  | 20.563537 | 15.877081 | 7.067854  |
| H  | 20.186221 | 16.311202 | 7.867036  |

|   |           |           |           |
|---|-----------|-----------|-----------|
| H | 21.423845 | 15.558844 | 7.551696  |
| O | 27.739390 | 9.279036  | 4.137013  |
| H | 27.283886 | 10.046041 | 4.484034  |
| H | 27.146693 | 8.915662  | 3.477917  |
| O | 26.668198 | 14.918416 | 8.167977  |
| H | 27.356634 | 15.558637 | 8.404222  |
| H | 26.386866 | 15.173994 | 7.259047  |
| O | 26.648965 | 11.866786 | 8.348541  |
| H | 25.742538 | 11.637218 | 8.581259  |
| H | 26.618014 | 12.832801 | 8.259329  |
| O | 29.602772 | 15.221064 | 6.585777  |
| H | 29.386325 | 15.091421 | 5.661599  |
| H | 30.212917 | 14.501134 | 6.776005  |
| O | 17.109122 | 11.474089 | 3.084464  |
| H | 17.916467 | 11.979383 | 2.991743  |
| H | 16.599510 | 11.670901 | 2.315747  |
| O | 17.072609 | 14.468903 | 5.431284  |
| H | 16.582727 | 14.978350 | 6.032848  |
| H | 17.529513 | 13.721212 | 5.801658  |
| O | 30.392851 | 15.111819 | 3.830119  |
| H | 29.925954 | 14.872980 | 3.025372  |
| H | 31.260389 | 14.736403 | 3.769820  |
| O | 23.890156 | 11.397624 | 9.263885  |
| H | 23.410567 | 11.803049 | 8.543846  |
| H | 24.121010 | 12.238489 | 9.648806  |
| O | 24.595042 | 18.628490 | 8.862690  |
| H | 23.738054 | 18.662877 | 8.430144  |
| H | 24.444495 | 18.279688 | 9.751993  |
| O | 20.485699 | 17.910238 | 9.062634  |
| H | 20.979267 | 18.269382 | 8.327654  |
| H | 20.996640 | 18.247586 | 9.807112  |
| O | 22.038920 | 15.382490 | 9.444727  |
| H | 21.276145 | 14.796643 | 9.713344  |
| H | 21.689850 | 16.252587 | 9.671755  |
| O | 24.784631 | 14.182782 | 10.011531 |
| H | 24.019652 | 14.663852 | 9.755394  |
| H | 25.491985 | 14.472685 | 9.393225  |
| O | 28.337220 | 16.421748 | 9.838114  |
| H | 29.188975 | 16.874587 | 9.855990  |
| H | 28.475322 | 15.683310 | 10.450500 |
| O | 19.369693 | 11.228497 | 10.128692 |
| H | 19.256546 | 10.920813 | 9.233490  |
| H | 19.749464 | 10.483512 | 10.591523 |
| O | 16.664179 | 15.016102 | 9.950031  |
| H | 16.760440 | 15.961041 | 10.159429 |
| H | 16.217778 | 15.175284 | 9.104428  |
| O | 15.384628 | 15.281920 | 7.707046  |
| H | 14.432455 | 15.292148 | 7.623648  |
| H | 15.526399 | 14.365222 | 7.537191  |
| O | 31.759945 | 13.526182 | 7.258539  |
| H | 32.069826 | 13.084657 | 6.446916  |
| H | 31.751144 | 12.752112 | 7.835325  |

|   |           |           |           |
|---|-----------|-----------|-----------|
| O | 19.982971 | 13.859003 | 10.373315 |
| H | 19.101549 | 14.181605 | 10.439274 |
| H | 19.908821 | 12.919782 | 10.455325 |
| O | 33.065150 | 13.209722 | 3.157523  |
| H | 32.707811 | 13.790989 | 2.484810  |
| H | 33.390056 | 13.828641 | 3.813746  |
| O | 13.041674 | 14.168380 | 6.836037  |
| H | 13.716875 | 13.909366 | 6.218382  |
| H | 13.090708 | 13.461890 | 7.458808  |
| O | 29.776507 | 11.371002 | 6.871021  |
| H | 29.438895 | 12.220848 | 6.621092  |
| H | 28.961478 | 10.855405 | 6.822680  |

### O-Isoniazide-Parallel-Top-B-Cluster-MP2-AIM

115

|   |             |              |              |
|---|-------------|--------------|--------------|
| C | 5.442000001 | -4.551000001 | 23.339900003 |
| C | 5.328900001 | -3.142900000 | 23.347900003 |
| C | 6.514000001 | -2.367900000 | 23.349000003 |
| C | 7.748000001 | -3.064900000 | 23.349000003 |
| C | 7.742000001 | -4.474000001 | 23.353900003 |
| N | 6.613900001 | -5.232000001 | 23.344900003 |
| C | 6.604000001 | -0.874000000 | 23.243900003 |
| O | 7.639900001 | -0.324000000 | 22.833900003 |
| N | 5.508000001 | -0.068000000 | 23.545000003 |
| N | 4.423000001 | -0.492000000 | 24.344000003 |
| N | 1.233000000 | -3.674900000 | 19.914900002 |
| N | 1.231000000 | -7.936000001 | 20.039900002 |
| B | 1.234000000 | -6.517000001 | 19.940000002 |
| N | 2.468000000 | -5.807900001 | 19.926900002 |
| B | 2.462000000 | -8.647900001 | 20.065900002 |
| N | 3.693900000 | -7.937000001 | 20.079900002 |
| N | 1.231000000 | 0.590000000  | 19.900900002 |
| B | 1.229000000 | 2.012000000  | 19.920900002 |
| N | 2.462000000 | 2.719900000  | 19.902900002 |
| B | 2.460900000 | 4.142000000  | 19.937000002 |
| N | 3.692000000 | 4.851000001  | 19.902000002 |
| B | 1.231000000 | -2.253000000 | 19.934000002 |
| N | 2.460900000 | -1.543000000 | 20.001000002 |
| B | 2.460900000 | -0.122000000 | 19.943900002 |
| N | 3.692000000 | 0.588000000  | 19.989900002 |
| B | 3.693000000 | 2.008900000  | 19.937000002 |
| N | 4.924000001 | 2.718000000  | 19.966900002 |
| B | 4.923000001 | 4.139900000  | 19.936000002 |
| N | 6.153900001 | 4.851000001  | 19.974000002 |
| B | 2.464000000 | -4.386000001 | 19.943900002 |
| N | 3.692000000 | -3.674900000 | 20.039900002 |
| B | 3.693000000 | -2.254000000 | 20.053000002 |

|   |              |              |              |
|---|--------------|--------------|--------------|
| N | 4.924900001  | -1.544900000 | 20.057900002 |
| B | 4.924000001  | -0.122000000 | 20.062000002 |
| N | 6.152000001  | 0.587000000  | 20.105000002 |
| B | 6.153900001  | 2.008000000  | 20.067000002 |
| N | 7.383000001  | 2.721000000  | 20.109900002 |
| B | 7.384000001  | 4.141000000  | 20.056900002 |
| N | 8.615000001  | 4.852900001  | 20.039900002 |
| B | 3.694900000  | -6.514900001 | 20.067000002 |
| N | 4.921900001  | -5.804000001 | 20.172900002 |
| B | 4.924000001  | -4.384900001 | 20.073000002 |
| N | 6.152900001  | -3.676000000 | 19.995000002 |
| B | 6.155000001  | -2.254000000 | 19.952900002 |
| N | 7.381900001  | -1.540000000 | 19.899000002 |
| B | 7.384900001  | -0.124000000 | 20.056900002 |
| N | 8.614000001  | 0.589000000  | 20.036000002 |
| B | 8.614000001  | 2.007000000  | 20.079000002 |
| N | 9.845000001  | 2.719900000  | 20.085000002 |
| B | 9.846000001  | 4.141000000  | 20.065900002 |
| N | 11.076900001 | 4.852000001  | 20.079900002 |
| B | 4.924900001  | -8.647000001 | 20.074900002 |
| N | 6.155000001  | -7.939000001 | 20.170900002 |
| B | 6.155000001  | -6.514900001 | 20.204000002 |
| N | 7.387900001  | -5.804000001 | 20.175000002 |
| B | 7.384000001  | -4.386000001 | 20.051900002 |
| N | 8.611000001  | -3.674900000 | 19.928900002 |
| B | 8.612000001  | -2.251900000 | 19.940900002 |
| N | 9.842000001  | -1.544900000 | 20.051900002 |
| B | 9.843000001  | -0.122000000 | 20.071000002 |
| N | 11.076900001 | 0.588000000  | 20.105000002 |
| B | 11.076000001 | 2.008900000  | 20.064000002 |
| N | 12.304900001 | 2.722000000  | 19.992900002 |
| B | 7.384000001  | -8.646000001 | 20.065000002 |
| N | 8.618000001  | -7.937900001 | 20.056000002 |
| B | 8.614000001  | -6.514900001 | 20.068900002 |
| N | 9.843000001  | -5.806000001 | 19.955900002 |
| B | 9.843000001  | -4.383000001 | 19.940000002 |
| N | 11.076000001 | -3.673000000 | 19.960000002 |
| B | 11.074900001 | -2.253000000 | 20.053000002 |
| N | 12.310000001 | -1.544900000 | 20.071000002 |
| B | 12.307000001 | -0.122000000 | 20.059000002 |
| N | 13.535000002 | 0.588000000  | 19.954000002 |
| B | 12.307900001 | 4.142000000  | 20.074900002 |
| B | 13.535000002 | 2.011000000  | 19.945000002 |
| B | 9.843900001  | -8.647000001 | 19.937000002 |
| N | 11.076000001 | -7.937900001 | 19.902000002 |
| B | 11.073900001 | -6.516000001 | 19.928000002 |
| N | 12.305900001 | -5.806000001 | 19.914000002 |
| B | 12.305900001 | -4.384000001 | 19.932900002 |
| N | 13.538900002 | -3.674900000 | 19.923900002 |
| B | 13.535900002 | -2.253000000 | 19.946900002 |
| B | 12.307000001 | -8.647900001 | 19.936000002 |
| N | 13.538000002 | -7.937000001 | 19.974000002 |

|   |              |              |              |
|---|--------------|--------------|--------------|
| B | 13.538000002 | -6.516000001 | 19.931000002 |
| H | 4.522000001  | -5.174900001 | 23.320000003 |
| H | 4.336000001  | -2.661900000 | 23.347900003 |
| H | 8.692900001  | -2.484900000 | 23.321900003 |
| H | 8.702000001  | -5.033900001 | 23.347900003 |
| H | 5.743000001  | 0.935000000  | 23.495900003 |
| H | 4.536900001  | -0.136000000 | 25.309000003 |
| H | 3.557900000  | -0.090000000 | 23.952900003 |
| H | 2.460900000  | -9.788000001 | 20.076000002 |
| H | 4.926900001  | -9.784000001 | 19.993900002 |
| H | 7.381000001  | -9.782900001 | 19.986900002 |
| H | 9.839900001  | -9.785000001 | 19.870000002 |
| H | 12.307000001 | -9.788000001 | 19.932900002 |
| H | 0.249000000  | -5.948000001 | 19.870000002 |
| H | 0.242000000  | 2.581900000  | 19.951000002 |
| H | 1.475000000  | 4.711900001  | 19.992000002 |
| H | 0.244000000  | -1.683000000 | 19.896000002 |
| H | 13.294900002 | 4.708900001  | 20.137000002 |
| H | 14.521000002 | 2.581000000  | 19.899000002 |
| H | 14.518000002 | -1.680000000 | 19.865900002 |
| H | 14.525000002 | -5.945900001 | 19.910000002 |
| H | 0.382000000  | -4.142000000 | 19.954900002 |
| H | 0.389000000  | -8.374000001 | 20.033000002 |
| H | 14.458000002 | -8.442000001 | 20.054900002 |
| H | 14.519000002 | -4.242000001 | 19.981000002 |
| H | 14.406000002 | 0.060000000  | 19.995000002 |
| H | 11.064900001 | 5.865000001  | 19.990900002 |
| H | 8.646000001  | 5.908900001  | 19.998900002 |
| H | 6.128000001  | 6.044900001  | 19.896900002 |
| H | 0.475000000  | 0.125000000  | 19.878000002 |
| H | 3.724000000  | 5.953900001  | 19.960900002 |

#### O-Isoniazide-Parallel-Top-B-vdw-opted

89

|   |           |           |           |
|---|-----------|-----------|-----------|
| B | -0.000774 | -0.120828 | -0.073563 |
| N | 1.230632  | 0.589829  | -0.098564 |
| B | 1.228976  | 2.012250  | -0.078607 |
| N | 2.461622  | 2.720261  | -0.096697 |
| B | 2.460600  | 4.142153  | -0.062554 |
| N | 3.692270  | 4.851063  | -0.097884 |
| B | 3.690640  | 6.273061  | -0.072230 |
| N | 4.922592  | 6.982821  | -0.086126 |
| B | 4.922354  | 8.404609  | -0.067168 |
| N | 6.154999  | 9.113960  | -0.076364 |
| B | 6.152856  | 10.535715 | -0.053152 |
| N | 7.384065  | 11.246168 | -0.091523 |
| B | 1.231427  | -2.253485 | -0.066009 |

|   |           |            |           |
|---|-----------|------------|-----------|
| N | 2.461329  | -1.542510  | 0.001198  |
| B | 2.461397  | -0.121573  | -0.056139 |
| N | 3.692243  | 0.588006   | -0.010380 |
| B | 3.692748  | 2.009223   | -0.062625 |
| N | 4.924434  | 2.718483   | -0.032698 |
| B | 4.923448  | 4.140470   | -0.064080 |
| N | 6.153950  | 4.851502   | -0.025588 |
| B | 6.153976  | 6.272524   | -0.068696 |
| N | 7.386455  | 6.982089   | -0.086680 |
| B | 7.385176  | 8.403524   | -0.080506 |
| N | 8.616578  | 9.113875   | -0.085442 |
| B | 2.464094  | -4.385757  | -0.056069 |
| N | 3.691570  | -3.675084  | 0.039525  |
| B | 3.693388  | -2.253568  | 0.052525  |
| N | 4.925077  | -1.544686  | 0.057915  |
| B | 4.923733  | -0.122486  | 0.061734  |
| N | 6.152242  | 0.587355   | 0.104997  |
| B | 6.154014  | 2.007788   | 0.066976  |
| N | 7.382714  | 2.721152   | 0.109832  |
| B | 7.383916  | 4.141380   | 0.056970  |
| N | 8.614813  | 4.853043   | 0.040322  |
| B | 8.617770  | 6.271309   | -0.059653 |
| N | 9.851546  | 6.980915   | -0.072555 |
| B | 3.694838  | -6.515361  | 0.067405  |
| N | 4.921905  | -5.804407  | 0.173385  |
| B | 4.924438  | -4.385240  | 0.073163  |
| N | 6.153100  | -3.676394  | -0.005342 |
| B | 6.155133  | -2.254198  | -0.046909 |
| N | 7.382078  | -1.540050  | -0.100593 |
| B | 7.385090  | -0.124446  | 0.056790  |
| N | 8.614353  | 0.588719   | 0.035732  |
| B | 8.613734  | 2.006982   | 0.079222  |
| N | 9.844813  | 2.719826   | 0.085266  |
| B | 9.845878  | 4.140776   | 0.066421  |
| N | 11.077323 | 4.851933   | 0.080220  |
| B | 4.924865  | -8.647121  | 0.075449  |
| N | 6.154945  | -7.938652  | 0.171138  |
| B | 6.155454  | -6.514990  | 0.203658  |
| N | 7.387885  | -5.803775  | 0.175186  |
| B | 7.383785  | -4.385993  | 0.052201  |
| N | 8.610592  | -3.675404  | -0.071002 |
| B | 8.611936  | -2.251679  | -0.059186 |
| N | 9.842479  | -1.545468  | 0.051935  |
| B | 9.842832  | -0.122102  | 0.071251  |
| N | 11.076634 | 0.587883   | 0.105034  |
| B | 11.075617 | 2.009406   | 0.063632  |
| N | 12.305433 | 2.721507   | -0.007233 |
| B | 6.151648  | -10.777765 | -0.055287 |
| N | 7.381920  | -10.064135 | -0.061091 |
| B | 7.383854  | -8.646180  | 0.065305  |
| N | 8.617745  | -7.938068  | 0.056008  |
| B | 8.613989  | -6.514816  | 0.068879  |

|   |           |           |           |
|---|-----------|-----------|-----------|
| N | 9.842795  | -5.805821 | -0.043708 |
| B | 9.842748  | -4.383347 | -0.059962 |
| N | 11.075576 | -3.673480 | -0.039567 |
| B | 11.074641 | -2.253179 | 0.053156  |
| N | 12.310162 | -1.545032 | 0.071031  |
| B | 12.306498 | -0.122061 | 0.059282  |
| N | 13.535330 | 0.588482  | -0.045597 |
| C | 5.441722  | -4.551252 | 3.340471  |
| C | 5.329179  | -3.142878 | 3.348209  |
| C | 6.514364  | -2.368136 | 3.349241  |
| C | 7.747753  | -3.065075 | 3.349171  |
| C | 7.741917  | -4.473801 | 3.354255  |
| N | 6.614363  | -5.231535 | 3.345385  |
| C | 6.603498  | -0.873665 | 3.244128  |
| O | 7.640438  | -0.323841 | 2.833640  |
| N | 5.507563  | -0.068377 | 3.544732  |
| N | 4.423027  | -0.491544 | 4.344284  |
| H | 4.521950  | -5.175345 | 3.319967  |
| H | 4.336113  | -2.661680 | 3.347543  |
| H | 8.692606  | -2.485492 | 3.322164  |
| H | 8.702339  | -5.033981 | 3.348156  |
| H | 5.743463  | 0.935290  | 3.495786  |
| H | 4.536810  | -0.136298 | 5.308916  |
| H | 3.557648  | -0.090268 | 3.953186  |

#### O-Isoniazide-parallel-Top-Si-Cluster-MP2-AIM

99

|    |              |              |              |
|----|--------------|--------------|--------------|
| Si | 23.140000003 | 5.160000001  | 0.090000000  |
| Si | 20.426900002 | 6.730000001  | 0.084000000  |
| C  | 21.332000003 | 5.166000001  | 0.099000000  |
| Si | 17.716000002 | 8.295900001  | 0.050000000  |
| C  | 18.620000002 | 6.730900001  | 0.059000000  |
| Si | 25.852000003 | 6.729000001  | 0.021000000  |
| Si | 28.565000003 | 8.295900001  | -0.035000000 |
| C  | 29.466900004 | 6.730000001  | 0.001000000  |
| Si | 28.562900003 | 5.163900001  | 0.016000000  |
| C  | 26.754900003 | 5.163900001  | 0.034000000  |
| Si | 31.277000004 | 9.861000001  | 0.025000000  |
| C  | 32.179900004 | 8.297000001  | 0.075000000  |
| Si | 31.277000004 | 6.732900001  | 0.047000000  |
| Si | 17.719900002 | 17.689000002 | 0.014000000  |
| C  | 18.623000002 | 16.125000002 | 0.065000000  |
| Si | 17.719900002 | 14.560900002 | 0.037000000  |
| C  | 18.621900002 | 12.993000002 | 0.068000000  |
| Si | 20.431900002 | 13.009000002 | 0.125000000  |
| C  | 21.335000003 | 14.560000002 | 0.190000000  |
| Si | 20.435900002 | 16.117000002 | 0.149000000  |

|    |              |              |              |
|----|--------------|--------------|--------------|
| C  | 21.332900003 | 17.689000002 | 0.183000000  |
| Si | 20.431000002 | 19.250000002 | 0.110000000  |
| Si | 23.140000003 | 20.815900002 | 0.094000000  |
| C  | 24.042900003 | 19.251900002 | 0.111000000  |
| Si | 23.144900003 | 17.675900002 | 0.171000000  |
| C  | 24.047000003 | 16.117900002 | 0.200000000  |
| Si | 23.152900003 | 14.535900002 | 0.387000000  |
| C  | 24.044000003 | 12.996000002 | -0.070000000 |
| Si | 23.147900003 | 11.442000001 | -0.010000000 |
| C  | 21.341000003 | 11.432900001 | 0.172900000  |
| Si | 20.429900002 | 9.867000001  | 0.112000000  |
| C  | 18.623000002 | 9.862000001  | 0.090000000  |
| Si | 17.718000002 | 11.429000001 | 0.050000000  |
| Si | 25.850000003 | 19.251000002 | 0.070900000  |
| C  | 26.754000003 | 17.684900002 | 0.055000000  |
| Si | 25.841900003 | 16.117900002 | 0.059000000  |
| C  | 26.754900003 | 14.557000002 | -0.062000000 |
| Si | 25.844000003 | 12.994900002 | -0.114000000 |
| C  | 26.754900003 | 11.426000001 | -0.166000000 |
| Si | 25.856000003 | 9.864000001  | -0.067000000 |
| C  | 24.045000003 | 9.865000001  | 0.057000000  |
| Si | 23.138900003 | 8.294000001  | 0.063000000  |
| C  | 21.332900003 | 8.298900001  | 0.104000000  |
| C  | 24.044000003 | 6.730900001  | 0.066000000  |
| C  | 26.754000003 | 8.295900001  | -0.032000000 |
| Si | 28.562900003 | 11.428000001 | -0.106000000 |
| C  | 29.468000004 | 12.990900002 | -0.066000000 |
| Si | 28.559000003 | 14.556000002 | -0.024000000 |
| C  | 29.466000004 | 16.121900002 | 0.019000000  |
| Si | 28.560900003 | 17.685900002 | 0.027000000  |
| Si | 31.272900004 | 16.123000002 | 0.064000000  |
| C  | 32.176900004 | 14.557900002 | 0.073000000  |
| Si | 31.272900004 | 12.990900002 | 0.022000000  |
| C  | 32.179000004 | 11.428000001 | 0.059000000  |
| C  | 29.466900004 | 9.862000001  | -0.048000000 |
| C  | 27.684000003 | 12.836000002 | 3.354000000  |
| C  | 26.335000003 | 12.462900001 | 3.262000000  |
| C  | 25.359900003 | 13.480000002 | 3.266000000  |
| C  | 25.797000003 | 14.813000002 | 3.415000000  |
| C  | 27.167000003 | 15.064900002 | 3.530000000  |
| N  | 28.109900003 | 14.103900002 | 3.477900000  |
| C  | 23.920900003 | 13.291900002 | 2.940900000  |
| O  | 23.263900003 | 14.265000002 | 2.443900000  |
| N  | 23.253000003 | 12.130000001 | 3.093900000  |
| N  | 23.815000003 | 10.916900001 | 3.516900000  |
| C  | 21.332000003 | 20.821900002 | 0.103000000  |
| C  | 18.621900002 | 19.256000002 | 0.049000000  |
| Si | 28.562900003 | 20.820000002 | 0.020000000  |
| C  | 26.754000003 | 20.818900002 | 0.039000000  |
| C  | 32.179000004 | 17.690000002 | 0.104000000  |
| Si | 31.274900004 | 19.256000002 | 0.065000000  |
| C  | 29.466900004 | 19.253000002 | 0.033000000  |



|   |              |              |              |
|---|--------------|--------------|--------------|
| H | 28.464900003 | 12.066000001 | 3.306000000  |
| H | 26.056900003 | 11.413900001 | 3.158900000  |
| H | 25.067000003 | 15.628000002 | 3.402000000  |
| H | 27.530900003 | 16.094000002 | 3.637900000  |
| H | 22.307900003 | 12.131900001 | 2.680000000  |
| H | 23.221000003 | 10.522000001 | 4.251900001  |
| H | 23.823000003 | 10.272000001 | 2.710000000  |
| H | 23.853900003 | 3.921000000  | 0.101900000  |
| H | 20.791000002 | 4.230900001  | 0.113000000  |
| H | 16.286900002 | 8.297000001  | 0.011000000  |
| H | 18.079900002 | 5.796000001  | 0.049000000  |
| H | 29.277900003 | 3.926000000  | 0.014000000  |
| H | 26.214900003 | 4.229000001  | 0.053000000  |
| H | 33.259000004 | 8.297000001  | 0.122000000  |
| H | 31.992900004 | 5.495000001  | 0.061000000  |
| H | 16.292000002 | 17.687900002 | -0.054000000 |
| H | 16.291000002 | 14.561900002 | -0.010000000 |
| H | 23.856900003 | 22.053000003 | 0.073000000  |
| H | 16.289000002 | 11.429000001 | 0.004000000  |
| H | 33.256000004 | 14.557900002 | 0.109000000  |
| H | 33.258000004 | 11.429900001 | 0.101000000  |
| H | 20.792000002 | 21.757000003 | 0.104000000  |
| H | 18.082900002 | 20.192000002 | 0.034000000  |
| H | 29.277900003 | 22.057900003 | -0.005000000 |
| H | 26.213000003 | 21.754000003 | 0.031000000  |
| H | 33.258000004 | 17.690000002 | 0.151000000  |
| H | 31.989000004 | 20.495000002 | 0.059000000  |

#### O-Isoniazide-parallel-Top-Si-vdw-opted

|    |             |             |             |
|----|-------------|-------------|-------------|
| 67 |             |             |             |
| Si | 33.98395128 | 14.55724061 | 0.09823861  |
| C  | 34.88875608 | 12.99366329 | 0.11404234  |
| Si | 12.29511246 | 14.55708678 | 0.01005814  |
| Si | 15.00769433 | 16.12395087 | -0.04579002 |
| C  | 15.90997308 | 14.55824327 | -0.00990594 |
| Si | 15.00615978 | 12.99236953 | 0.00544758  |
| C  | 13.19763259 | 12.99178812 | 0.02392123  |
| Si | 17.72001766 | 17.68865804 | 0.01444097  |
| C  | 18.62324376 | 16.12467118 | 0.06472728  |
| Si | 17.71993424 | 14.56074715 | 0.03652568  |
| C  | 18.6224556  | 12.99297504 | 0.0680951   |
| Si | 20.43217693 | 13.00930433 | 0.12507207  |
| C  | 21.3354401  | 14.55971956 | 0.18990559  |
| Si | 20.43553538 | 16.11666251 | 0.14918147  |
| C  | 21.3333215  | 17.68949253 | 0.18307726  |
| Si | 20.43099064 | 19.25036086 | 0.11032534  |
| Si | 23.13954623 | 20.81588188 | 0.09380459  |
| C  | 24.04293611 | 19.25194787 | 0.1107026   |

|    |             |             |             |
|----|-------------|-------------|-------------|
| Si | 23.14493724 | 17.67634203 | 0.17067118  |
| C  | 24.04717522 | 16.11825877 | 0.2004582   |
| Si | 23.15338655 | 14.53606604 | 0.38724807  |
| C  | 24.04367189 | 12.9959613  | -0.06961456 |
| Si | 23.14845839 | 11.44180649 | -0.00996269 |
| C  | 21.34091476 | 11.4326     | 0.17274933  |
| Si | 20.43036837 | 9.86726766  | 0.11203733  |
| C  | 18.62254945 | 9.86219467  | 0.08961349  |
| Si | 17.71801756 | 11.42890152 | 0.05025302  |
| C  | 15.90967237 | 11.42587291 | 0.01789878  |
| Si | 25.84991455 | 19.25065501 | 0.07126087  |
| C  | 26.75400131 | 17.68518196 | 0.05493068  |
| Si | 25.84214833 | 16.11791242 | 0.05927242  |
| C  | 26.75451108 | 14.55704265 | -0.06248801 |
| Si | 25.84399384 | 12.99512926 | -0.11360084 |
| C  | 26.7546554  | 11.42599359 | -0.16628317 |
| Si | 25.85601399 | 9.86414284  | -0.06732219 |
| C  | 24.04499425 | 9.86478928  | 0.05717699  |
| Si | 23.13932926 | 8.29419603  | 0.06258022  |
| C  | 21.33257909 | 8.29859411  | 0.10391683  |
| C  | 24.04361581 | 6.73058346  | 0.06626374  |
| C  | 26.75443625 | 8.29613031  | -0.03201213 |
| Si | 28.56287066 | 11.4278839  | -0.10642475 |
| C  | 29.46752349 | 12.99133819 | -0.06592326 |
| Si | 28.55875292 | 14.55620166 | -0.02362844 |
| C  | 29.46625826 | 16.12165016 | 0.01932305  |
| Si | 28.56101125 | 17.68617161 | 0.02733804  |
| Si | 31.2725204  | 16.12308082 | 0.06412395  |
| C  | 32.17732605 | 14.55820958 | 0.07328265  |
| Si | 31.27300359 | 12.99147071 | 0.02241253  |
| C  | 32.17880994 | 11.42779779 | 0.05943339  |
| C  | 29.46721992 | 9.86243813  | -0.04770031 |
| C  | 27.68411215 | 12.83570777 | 3.35402374  |
| C  | 26.33510999 | 12.4629567  | 3.26162685  |
| C  | 25.35991634 | 13.48036701 | 3.26588178  |
| C  | 25.7966204  | 14.81306905 | 3.41481618  |
| C  | 27.16728634 | 15.06478177 | 3.53045527  |
| N  | 28.11034605 | 14.1044671  | 3.477513    |
| C  | 23.92083388 | 13.29181163 | 2.94120787  |
| O  | 23.26389112 | 14.26548287 | 2.4440614   |
| N  | 23.2529525  | 12.12978228 | 3.09391315  |
| N  | 23.81541407 | 10.91704937 | 3.51681203  |
| H  | 28.46523979 | 12.06621278 | 3.30614268  |
| H  | 26.05731315 | 11.41427202 | 3.15883526  |
| H  | 25.06673837 | 15.6284689  | 3.40244149  |
| H  | 27.53096062 | 16.09422695 | 3.63798003  |
| H  | 22.30840323 | 12.13215471 | 2.68024607  |
| H  | 23.22098154 | 10.52224003 | 4.25193211  |
| H  | 23.82311259 | 10.27173114 | 2.70978235  |

O-Isoniazide-Top-Al-AlN-Cluster-MP2-AIM

|    |              |              |              |
|----|--------------|--------------|--------------|
| Al | 31.464900004 | 11.099000001 | -0.079000000 |
| Al | 34.213000004 | 12.683900002 | -0.037000000 |
| Al | 20.481000002 | 20.612900002 | -0.037000000 |
| N  | 21.405900003 | 15.859000002 | -0.039000000 |
| Al | 20.481900002 | 17.443000002 | -0.020000000 |
| Al | 23.234000003 | 19.025900002 | 0.141900000  |
| N  | 21.402900003 | 19.027900002 | 0.045000000  |
| N  | 24.161000003 | 20.609900002 | 0.189000000  |
| Al | 23.234900003 | 22.193000003 | 0.064000000  |
| Al | 25.977000003 | 23.780900003 | 0.116000000  |
| N  | 24.144900003 | 14.274000002 | -0.013000000 |
| Al | 23.237900003 | 15.862900002 | 0.037000000  |
| Al | 25.998000003 | 17.449900002 | 0.268000000  |
| N  | 24.161000003 | 17.445000002 | 0.188000000  |
| N  | 26.908900003 | 19.025900002 | 0.601000000  |
| Al | 25.995000003 | 20.597900002 | 0.284900000  |
| Al | 28.728000003 | 22.187900003 | 0.094000000  |
| N  | 26.893000003 | 22.196000003 | 0.256000000  |
| N  | 29.632000004 | 23.783900003 | 0.013000000  |
| Al | 28.719900003 | 25.370000003 | -0.002000000 |
| N  | 26.887000003 | 12.686900002 | -0.064000000 |
| Al | 25.978000003 | 14.278900002 | -0.008000000 |
| Al | 28.727000003 | 15.865900002 | -0.099000000 |
| N  | 26.893900003 | 15.864000002 | 0.070900000  |
| N  | 29.617900004 | 17.446900002 | -0.177000000 |
| Al | 28.804900003 | 18.989000002 | 0.450000000  |
| Al | 31.446000004 | 20.611900002 | -0.066000000 |
| N  | 29.623000004 | 20.609000002 | 0.042000000  |
| N  | 32.381000004 | 22.195000003 | -0.074000000 |
| Al | 31.463900004 | 23.780900003 | -0.044000000 |
| N  | 29.632900004 | 11.099000001 | -0.070900000 |
| Al | 28.719000003 | 12.686900002 | -0.103000000 |
| Al | 31.463000004 | 14.272900002 | -0.164000000 |
| N  | 29.631000004 | 14.268000002 | -0.181000000 |
| N  | 32.381900004 | 15.856900002 | -0.189000000 |
| Al | 31.443900004 | 17.440000002 | -0.151000000 |
| Al | 34.203000004 | 19.024900002 | -0.082000000 |
| N  | 32.371900004 | 19.027000002 | -0.078000000 |
| N  | 35.127000004 | 20.611900002 | -0.066000000 |
| Al | 34.213000004 | 22.199900003 | -0.072000000 |
| N  | 32.381000004 | 12.685000002 | -0.101000000 |
| N  | 35.137000004 | 14.266900002 | -0.046000000 |
| Al | 34.210000004 | 15.852900002 | -0.105000000 |
| Al | 36.957900004 | 17.439000002 | -0.021000000 |
| N  | 35.128000004 | 17.439000002 | -0.072000000 |
| N  | 37.872900005 | 19.024900002 | -0.042900000 |
| Al | 36.959000004 | 20.614000002 | -0.049000000 |
| C  | 30.593000004 | 20.548900002 | 6.626900001  |
| C  | 29.573000004 | 20.126000002 | 5.764900001  |
| C  | 29.882900004 | 19.960000002 | 4.403000001  |

|    |              |              |              |
|----|--------------|--------------|--------------|
| C  | 31.199900004 | 20.228000002 | 3.984900000  |
| C  | 32.128900004 | 20.673000002 | 4.929900001  |
| N  | 31.847900004 | 20.832000002 | 6.235000001  |
| C  | 28.943900003 | 19.478900002 | 3.354000000  |
| O  | 29.437000004 | 18.876900002 | 2.347900000  |
| N  | 27.611900003 | 19.667900002 | 3.386000000  |
| N  | 26.986000003 | 20.524900002 | 4.312000001  |
| N  | 21.405900003 | 22.196900003 | -0.046000000 |
| Al | 23.225900003 | 25.367900003 | -0.021000000 |
| N  | 24.141900003 | 26.954000003 | -0.042900000 |
| N  | 24.144900003 | 23.782000003 | 0.069000000  |
| N  | 26.887000003 | 25.368900003 | 0.046000000  |
| Al | 25.974000003 | 26.957000003 | -0.024000000 |
| N  | 32.381900004 | 25.370000003 | -0.061000000 |
| Al | 31.464900004 | 26.955900003 | -0.079000000 |
| N  | 35.137000004 | 23.786900003 | -0.039000000 |
| Al | 34.213900004 | 25.370900003 | -0.020000000 |
| N  | 37.877000005 | 22.202000003 | -0.013000000 |
| Al | 36.969900004 | 23.791000003 | 0.037000000  |
| N  | 26.887000003 | 28.544000003 | -0.064000000 |
| N  | 29.632900004 | 26.955900003 | -0.070900000 |
| Al | 28.719000003 | 28.544000003 | -0.103000000 |
| H  | 30.385000004 | 20.670900002 | 7.697000001  |
| H  | 28.568000003 | 19.932900002 | 6.141000001  |
| H  | 31.481900004 | 20.083900002 | 2.937000000  |
| H  | 33.155900004 | 20.905900002 | 4.623900001  |
| H  | 27.126900003 | 19.373000002 | 2.492000000  |
| H  | 26.745900003 | 21.403900003 | 3.834000000  |
| H  | 26.111900003 | 20.082000002 | 4.612000001  |
| H  | 18.981900002 | 20.612900002 | -0.096000000 |
| H  | 32.215000004 | 9.800000001  | -0.068000000 |
| H  | 34.957900004 | 11.384000001 | 0.023000000  |
| H  | 37.707000005 | 16.140900002 | 0.039000000  |
| H  | 21.727000003 | 25.364900003 | -0.076000000 |
| H  | 32.215000004 | 28.254900003 | -0.100000000 |
| H  | 34.960000004 | 26.670900003 | 0.029000000  |
| H  | 37.719000005 | 25.085900003 | 0.139000000  |
| H  | 29.469000004 | 29.841900004 | -0.161000000 |
| H  | 23.518900003 | 27.850000003 | -0.038000000 |
| H  | 26.205900003 | 29.504900004 | -0.057000000 |
| H  | 39.201900005 | 22.219900003 | -0.058000000 |
| H  | 39.045900005 | 19.013900002 | -0.018000000 |
| H  | 36.402900004 | 14.256000002 | -0.059000000 |
| H  | 29.155000003 | 10.102900001 | -0.011000000 |
| H  | 26.385000003 | 11.708900001 | -0.033000000 |
| H  | 23.628000003 | 13.263900002 | 0.046000000  |
| H  | 20.719900002 | 14.864000002 | -0.076000000 |
| H  | 20.782000002 | 23.012000003 | -0.079000000 |
| H  | 18.981900002 | 17.442000002 | -0.057000000 |

## O-Isoniazide-Top-Al-AlN-vdw-opted

67

|    |         |          |          |
|----|---------|----------|----------|
| N  | 18.6505 | 17.44212 | -0.06127 |
| Al | 17.7332 | 19.02854 | -0.07923 |
| Al | 20.4814 | 20.61312 | -0.03676 |
| N  | 21.4058 | 15.85932 | -0.03927 |
| Al | 20.4825 | 17.44274 | -0.01998 |
| Al | 23.2342 | 19.02555 | 0.142207 |
| N  | 21.4034 | 19.02822 | 0.045077 |
| N  | 24.1608 | 20.60956 | 0.188687 |
| Al | 23.2351 | 22.19285 | 0.063924 |
| Al | 25.9766 | 23.7813  | 0.116071 |
| N  | 24.145  | 14.27399 | -0.01321 |
| Al | 23.238  | 15.86311 | 0.037097 |
| Al | 25.9982 | 17.45019 | 0.26755  |
| N  | 24.1608 | 17.44455 | 0.188135 |
| N  | 26.9093 | 19.0259  | 0.60086  |
| Al | 25.9947 | 20.59793 | 0.284547 |
| Al | 28.728  | 22.18814 | 0.093552 |
| N  | 26.8929 | 22.19598 | 0.256416 |
| N  | 29.6319 | 23.78354 | 0.012504 |
| Al | 28.7198 | 25.36966 | -0.00156 |
| N  | 26.8871 | 12.68713 | -0.06444 |
| Al | 25.9783 | 14.27866 | -0.00773 |
| Al | 28.7267 | 15.86586 | -0.09898 |
| N  | 26.8942 | 15.86409 | 0.071026 |
| N  | 29.6181 | 17.44731 | -0.1775  |
| Al | 28.8048 | 18.98888 | 0.450343 |
| Al | 31.4457 | 20.61154 | -0.06623 |
| N  | 29.6232 | 20.60853 | 0.042277 |
| N  | 32.3807 | 22.19474 | -0.07425 |
| Al | 31.4641 | 23.78096 | -0.04434 |
| N  | 29.633  | 11.09852 | -0.07109 |
| Al | 28.7188 | 12.68656 | -0.10286 |
| Al | 31.4628 | 14.27336 | -0.16376 |
| N  | 29.6309 | 14.26815 | -0.18104 |
| N  | 32.3822 | 15.85714 | -0.18915 |
| Al | 31.4435 | 17.43966 | -0.15112 |
| Al | 34.2033 | 19.02543 | -0.08206 |
| N  | 32.3719 | 19.02699 | -0.078   |
| N  | 35.1272 | 20.61192 | -0.06601 |
| Al | 34.2129 | 22.19988 | -0.07171 |
| N  | 32.3813 | 12.68483 | -0.10109 |
| N  | 35.137  | 14.26718 | -0.04558 |
| Al | 34.2105 | 15.85328 | -0.10543 |
| Al | 36.9576 | 17.4385  | -0.02073 |
| N  | 35.1279 | 17.43946 | -0.07195 |
| N  | 37.8732 | 19.02504 | -0.04273 |
| Al | 36.9589 | 20.61435 | -0.0494  |
| N  | 37.8766 | 15.85275 | 0.068715 |

|    |         |          |          |
|----|---------|----------|----------|
| N  | 40.6187 | 17.4399  | 0.046037 |
| Al | 39.7049 | 19.02808 | -0.02379 |
| C  | 30.5927 | 20.54872 | 6.627411 |
| C  | 29.5733 | 20.12613 | 5.764574 |
| C  | 29.8832 | 19.96002 | 4.403345 |
| C  | 31.1997 | 20.22815 | 3.984543 |
| C  | 32.1294 | 20.67257 | 4.929824 |
| N  | 31.8484 | 20.83196 | 6.234713 |
| C  | 28.9437 | 19.47932 | 3.353538 |
| O  | 29.4374 | 18.87743 | 2.34823  |
| N  | 27.6117 | 19.66828 | 3.386122 |
| N  | 26.9855 | 20.52544 | 4.312171 |
| H  | 30.3846 | 20.67117 | 7.696898 |
| H  | 28.5678 | 19.93319 | 6.141309 |
| H  | 31.4818 | 20.08408 | 2.9373   |
| H  | 33.1565 | 20.9056  | 4.623745 |
| H  | 27.1266 | 19.37311 | 2.492163 |
| H  | 26.7455 | 21.40431 | 3.833915 |
| H  | 26.1117 | 20.08167 | 4.611599 |
